## EXPRESSION OF CONCERN

# Expression of Concern: Carbapenem Resistance and *Acinetobacter baumannii* in Senegal: The Paradigm of a Common Phenomenon in Natural Reservoirs

The *PLOS ONE* Editors

This article [1] has been identified as one of a series of submissions for which we have concerns about the reported research ethics approval information and the article's adherence to PLOS research ethics policies.

PLOS will be investigating these concerns in accordance with COPE guidance and journal policies. Meanwhile, the *PLOS ONE* Editors issue this Expression of Concern.

## Reference

1. Kempf M, Rolain J- M, Diatta G, Azza S, Samb B, Mediannikov O, et al. (2012) Carbapenem Resistance and *Acinetobacter baumannii* in Senegal: The Paradigm of a Common Phenomenon in Natural Reservoirs. *PLoS ONE* 7(6): e39495. <https://doi.org/10.1371/journal.pone.0039495>

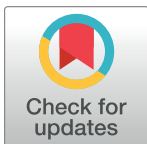

## OPEN ACCESS

**Citation:** The *PLOS ONE* Editors (2022) Expression of Concern: Carbapenem Resistance and *Acinetobacter baumannii* in Senegal: The Paradigm of a Common Phenomenon in Natural Reservoirs. *PLoS ONE* 17(12): e0277635. <https://doi.org/10.1371/journal.pone.0277635>

**Published:** December 13, 2022

**Copyright:** © 2022 The PLOS ONE Editors. This is an open access article distributed under the terms of the [Creative Commons Attribution License](https://creativecommons.org/licenses/by/4.0/), which permits unrestricted use, distribution, and reproduction in any medium, provided the original author and source are credited.
